# Supplementary material
Source: ML conference proceedings conference paper supplement (https://openreview.net/forum?id=3ZAgXBRvla)
Supplement: supplementary_material [file attachment]

# Appendix

## Table of Contents

|                                  |           |
|----------------------------------|-----------|
| <b>A Training Details</b>        | <b>12</b> |
| <b>B Simulation Details</b>      | <b>12</b> |
| <b>C Multi-modality Analysis</b> | <b>15</b> |
| <b>D Occlusion Analysis</b>      | <b>15</b> |
| <b>E Real-world Equipment</b>    | <b>15</b> |
| <b>F Workspace</b>               | <b>17</b> |
| <b>G Foreground Segmentation</b> | <b>17</b> |

### A Training Details

**Model Structure:** FlowBotHD consists of a current state encoder, a history state encoder and a denoiser. Both current and history state encoder are based on PointNet++ [38], where the history encoder only includes the PointNet++ encoding module (i.e. no decoder) that outputs a global latent of 128 dimensions. We kept the same model architecture and hyperparameter set as the original PointNet++ paper except for using a regression head for the history encoder output instead of the original segmentation head. We inject the history latent into every layer of the PointNet++ framework in the decoder (see Figure 1). This is performed through a hadamard product of the current point cloud encoding with the latent encodings at every decoding layer to produce the final output of the model. We base the denoiser on a DiT with 5 layers, 4 heads, and a hidden size of 128.

**Dataset Details:** Similar to the original FlowBot3D paper [1], we create a randomly opened dataset (RO) in which we randomly sample the view perspective, the target joint, and the open ratio. To open objects from the fully closed state, we create another mixed dataset (MD) in which we half of the objects are fully closed and the other half randomly opened. To enable history-aware training, we generate a dataset with 1/3 of the objects fully closed, 1/3 randomly opened but without history and the final third randomly opened and with history at random interval.

**Training Process:** We train the model for 450 epochs using AdamW optimizer with a weight decay of  $1e-5$ . We use a learning rate of  $1e-4$ , and a batch size of 128. We evaluate the model every 20 epochs, and save the checkpoint with the best winner-take-all RMSE metric. The Winner-take-all metric means that we repeatedly make predictions for each sample 20 times and record the best RMSE.

### B Simulation Details

We implement a simulation environment with PyBullet that simulates operating a suction gripper to operate PartNet-Mobility objects. We first roll out the simulation with ground truth flow and filter out samples that can't open with the ground truth motion, due to errors in the simulator. We repeat each sample for 5 times during evaluation. The final test object categories we evaluated on after filtering and repeating are listed in Table 2.

To manipulate the objects, we first attach the suction gripper to the object. This is implemented by first teleporting the gripper to a position close to the target grasp point and then gradually moving

| Icon | Name       | Count | Icon | Name         | Count | Icon | Name         | Count | Icon | Name     | Count |
|------|------------|-------|------|--------------|-------|------|--------------|-------|------|----------|-------|
|      | Oven       | 20    |      | Microwave    | 10    |      | Table        | 245   |      | Phone    | 5     |
|      | Bucket     | 10    |      | Window       | 55    |      | Furniture    | 765   |      | Door     | 30    |
|      | Box        | 20    |      | Kettle       | 25    |      | Dishwasher   | 45    |      | Laptop   | 40    |
|      | Toilet     | 55    |      | Safe         | 12    |      | WashMachine  | 25    |      | TrashCan | 35    |
|      | KitchenPot | 25    |      | Refrigerator | 75    |      | FoldingChair | 15    |      | Stapler  | 20    |

Table 2: Simulation Objects and Sample Counts

towards the target grasp point until contact is detected. After contact, we apply a physical force constraint between the gripper and the object. The move action is then implemented as applying a certain velocity along the predicted direction.

**Hyperparameter in Policy:** There are 3 hyperparameters to set in Algorithm 1: the threshold for switch grasp point  $\delta l$ , the threshold for consistency check  $\delta \theta_{cc}$  and the threshold for good movement  $\delta m$ . We set  $\delta l = 0.2$ ,  $\delta \theta_{cc} = 30^\circ$  and  $\delta m = 1e-2$  in simulation. Table 3 demonstrates the quantitative simulation results for the normalized distance metric, computed in the same way as in Eisner et al. [1].

|                    | SG | CC | HF | AVG <sub>c</sub> | AVG <sub>s</sub> |             |             |             |             |             |             |             |             |             |             |             |             |             |             |             |             |             |             |             |             |
|--------------------|----|----|----|------------------|------------------|-------------|-------------|-------------|-------------|-------------|-------------|-------------|-------------|-------------|-------------|-------------|-------------|-------------|-------------|-------------|-------------|-------------|-------------|-------------|-------------|
| Baselines          |    |    |    |                  |                  |             |             |             |             |             |             |             |             |             |             |             |             |             |             |             |             |             |             |             |             |
| FlowBot (RO)       | ×  | ×  | ×  | 0.250            | 0.166            | 0.23        | 0.54        | 0.29        | 0.29        | <b>0.00</b> | 0.90        | 0.10        | 0.23        | 0.35        | 0.31        | 0.10        | 0.15        | 0.18        | 0.10        | 0.10        | 0.48        | 0.39        | <b>0.07</b> | 0.11        | 0.08        |
| FlowBot (RO)       | ✓  | ×  | ×  | 0.220            | 0.117            | <b>0.16</b> | 0.53        | 0.29        | 0.22        | <b>0.00</b> | 0.43        | 0.10        | 0.15        | 0.45        | 0.14        | 0.05        | 0.09        | 0.18        | 0.09        | 0.27        | 0.31        | 0.46        | <b>0.07</b> | 0.15        | 0.26        |
| FlowBot (MD)       | ×  | ×  | ×  | 0.183            | 0.143            | 0.31        | <b>0.19</b> | 0.06        | 0.22        | <b>0.00</b> | <b>0.06</b> | 0.14        | 0.21        | 0.47        | 0.30        | 0.09        | 0.12        | 0.23        | 0.12        | 0.09        | 0.24        | 0.63        | <b>0.07</b> | <b>0.05</b> | 0.08        |
| FlowBot (MD)       | ✓  | ×  | ×  | 0.159            | 0.098            | 0.26        | 0.08        | 0.07        | 0.09        | <b>0.00</b> | <b>0.06</b> | 0.08        | 0.14        | 0.56        | <b>0.07</b> | 0.05        | 0.09        | 0.16        | 0.09        | <b>0.07</b> | 0.35        | 0.60        | <b>0.07</b> | 0.13        | 0.16        |
| Ablations          |    |    |    |                  |                  |             |             |             |             |             |             |             |             |             |             |             |             |             |             |             |             |             |             |             |             |
| Ours- No History   | ×  | ×  | ×  | 0.255            | 0.176            | 0.29        | 0.57        | 0.18        | 0.19        | 0.16        | 0.36        | 0.14        | 0.23        | 0.46        | 0.28        | 0.18        | 0.14        | 0.20        | 0.31        | <b>0.07</b> | 0.53        | 0.54        | <b>0.07</b> | 0.09        | 0.10        |
| Ours- No History   | ✓  | ×  | ×  | 0.178            | 0.113            | 0.26        | 0.36        | 0.09        | 0.09        | <b>0.00</b> | <b>0.06</b> | 0.13        | 0.10        | 0.38        | 0.17        | 0.08        | 0.09        | 0.12        | 0.21        | 0.31        | 0.29        | 0.45        | <b>0.07</b> | 0.10        | 0.20        |
| Ours- No History   | ✓  | ✓  | ×  | 0.176            | 0.110            | 0.28        | 0.28        | 0.19        | 0.10        | 0.08        | <b>0.06</b> | 0.10        | 0.12        | 0.75        | 0.11        | 0.07        | 0.10        | <b>0.10</b> | 0.08        | 0.10        | 0.11        | 0.45        | <b>0.07</b> | 0.11        | 0.27        |
| Ours- No Diffusion | ✓  | ×  | ×  | 0.265            | 0.213            | 0.35        | 0.67        | 0.55        | 0.15        | <b>0.00</b> | 0.51        | 0.14        | 0.19        | 0.73        | 0.31        | 0.15        | 0.20        | 0.31        | 0.37        | 0.11        | <b>0.08</b> | 0.55        | <b>0.07</b> | 0.12        | 0.08        |
| Ours- No Diffusion | ✓  | ×  | ✓  | 0.194            | 0.183            | 0.39        | 0.48        | 0.40        | 0.11        | <b>0.00</b> | 0.45        | 0.18        | 0.17        | <b>0.04</b> | 0.30        | 0.11        | 0.18        | 0.28        | 0.35        | 0.24        | <b>0.08</b> | 0.48        | <b>0.07</b> | 0.15        | <b>0.07</b> |
| Ours               |    |    |    |                  |                  |             |             |             |             |             |             |             |             |             |             |             |             |             |             |             |             |             |             |             |             |
| FlowBotHD          | ✓  | ×  | ×  | 0.181            | 0.139            | 0.55        | <b>0.50</b> | 0.13        | 0.05        | 0.04        | 0.39        | 0.12        | 0.15        | 0.33        | 0.08        | 0.15        | 0.10        | 0.40        | 0.11        | 0.23        | 0.09        | 0.52        | <b>0.07</b> | 0.10        | 0.09        |
| FlowBotHD          | ✓  | ✓  | ×  | 0.103            | 0.086            | 0.33        | 0.35        | 0.11        | <b>0.05</b> | <b>0.00</b> | <b>0.06</b> | <b>0.06</b> | <b>0.02</b> | 0.15        | 0.08        | 0.07        | 0.08        | 0.25        | 0.09        | 0.08        | 0.10        | 0.27        | <b>0.07</b> | 0.07        | 0.08        |
| FlowBotHD          | ✓  | ×  | ✓  | 0.110            | 0.096            | 0.53        | 0.52        | 0.13        | <b>0.05</b> | 0.04        | 0.10        | <b>0.06</b> | 0.15        | 0.24        | <b>0.07</b> | 0.05        | 0.07        | 0.21        | 0.13        | 0.23        | 0.11        | 0.49        | <b>0.07</b> | 0.12        | 0.10        |
| <b>FlowBotHD</b>   | ✓  | ✓  | ✓  | <b>0.096</b>     | <b>0.072</b>     | 0.25        | 0.26        | <b>0.05</b> | <b>0.05</b> | <b>0.00</b> | 0.20        | <b>0.06</b> | 0.11        | 0.38        | <b>0.07</b> | <b>0.04</b> | <b>0.06</b> | 0.18        | <b>0.07</b> | <b>0.07</b> | 0.09        | <b>0.23</b> | <b>0.07</b> | 0.09        | <b>0.07</b> |

Table 3: Normalized Distance Metric Results ( $\downarrow$ ): Normalized distances to the goal articulation joint angle after a full rollout of the methods. The lower the better.

We demonstrate the simulation process in Fig 4. We visualize the flow predictions (the first row), the simulation process (the last row, x-axis is the step number, the y-axis is the open ratio), and the trajectory plot along with policy signals (the middle plot). In these visuals, we can see our model and policy’s pattern of opening an object: make trials at the beginning, once the door is opened a bit, make consistent predictions based on past history and consistency check.

The first example is quite smooth, our model succeeds to move the door at the first step. Then it continues to make consistent and history-aware predictions until the door is fully opened. Consistency check didn’t have to filter out much predictions due to the good prediction quality, and history is always updated at each step, meaning that we’re always using the previous step’s history for the current step’s prediction. In the second example, our model makes several trials at the fully closed state. History is not updated during these steps and remains none. Once the door is opened, the history information and the consistency check enable the model to execute consistent actions. We can see from the background bar plot that for step 11, the consistency check filters out 12 inconsistent predictions, demonstrating the effectiveness of applying consistency check. Also, we can see that at step 6, the door is opened a bit, but the history is not updated due to the small movement (indicating the prediction is not good enough) which demonstrates how the history filter works.

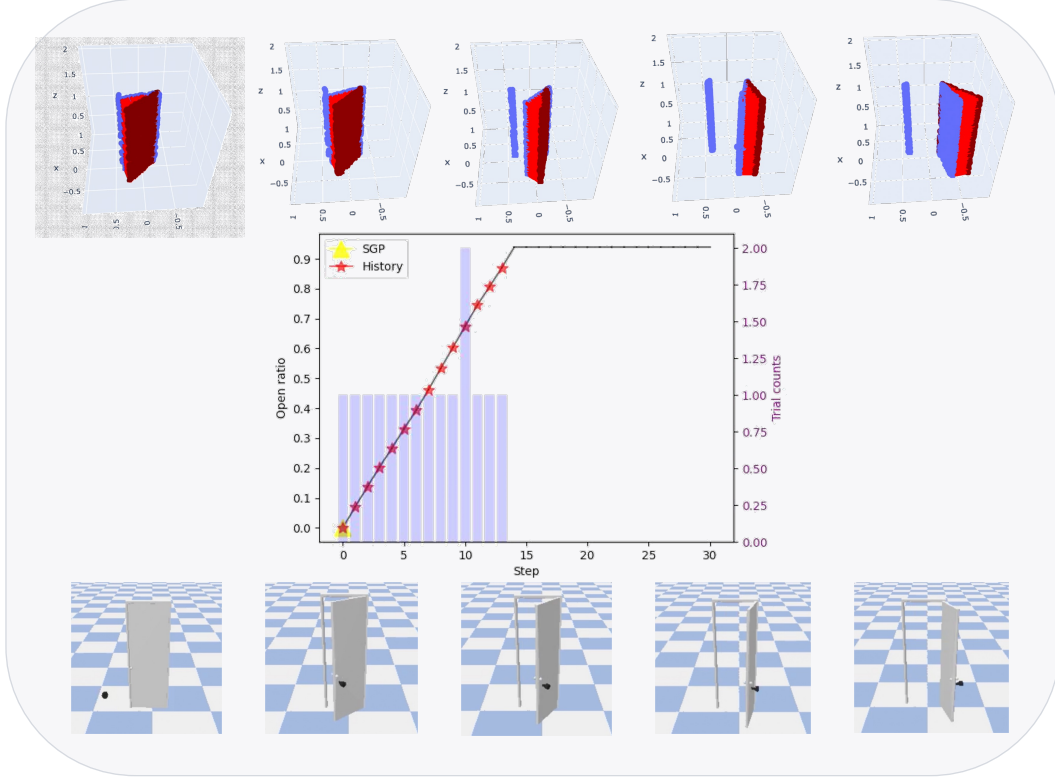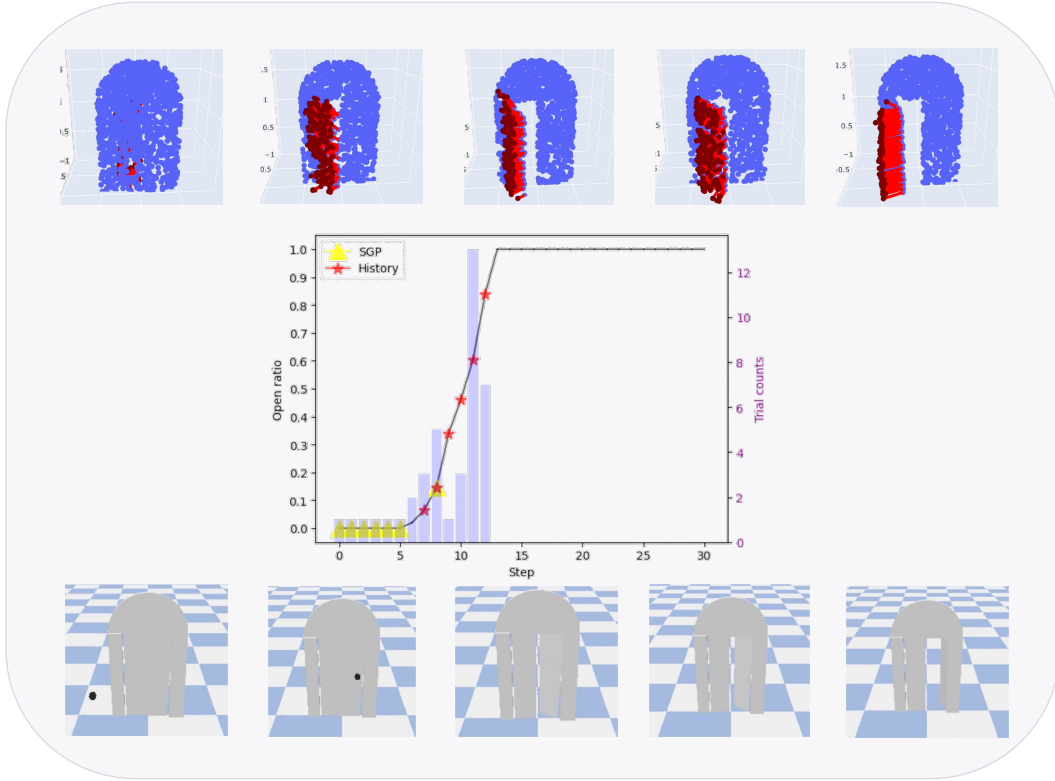

Figure 4: Simulation Visualizations: The plot in the middle is a simulation trajectory plot with x-axis as step number, and left y axis as the open ratio. We visualize the history update signal with red polygons, step with red polygon means updating this step's prediction as the latest history. Yellow triangle represents the switch grasp point (SGP) signal, meaning that this step requires a new grasp point. The bar plot on the background corresponds to number of trials we take to generate a prediction that satisfies the consistency check trial. The axis for the bar plot is the right y-axis.

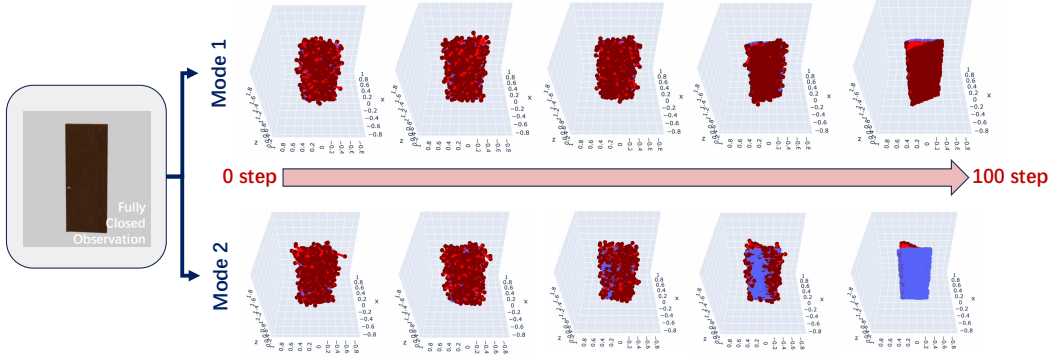

Figure 5: Multi-Model Diffusion Process Visualization: We visualize the denoising process (100 steps). We can see that the flow starts from pure random noises and gradually converges to different modes: Pull and Push.

## C Multi-modality Analysis

To specifically analyze our model’s improvements on handling multi-modality, we evaluated baseline FlowBot3D trained on randomly opened dataset (RO) / mixed dataset (MD) and our model FlowBotHD on doors. We open each test door from 0% to 100%. We average the metrics within 10% open to compute the performance for closed doors, and we average the metrics above 10% open to compute the performance for open doors. As we can see from Table 4, our model outperforms the baselines by a large margin across all metrics. The observation that FlowBot3D trained on randomly opened dataset outperforms the one trained on the mixed dataset shows that multi-modal training data can confuse the regression models’ training process.

| Model                     | Cosine (↑)     |                |               | RMSE (↓)       |                |               | MAG (↓)        |                |               |
|---------------------------|----------------|----------------|---------------|----------------|----------------|---------------|----------------|----------------|---------------|
|                           | FlowBot3D (RO) | FlowBot3D (MD) | FlowBotHD     | FlowBot3D (RO) | FlowBot3D (MD) | FlowBotHD     | FlowBot3D (RO) | FlowBot3D (MD) | FlowBotHD     |
| Closed (<10% open)        | 0.2033         | 0.3129         | <b>0.8046</b> | 0.4426         | 0.4069         | <b>0.1833</b> | 0.2468         | 0.2150         | <b>0.1047</b> |
| Randomly Open (>10% open) | 0.7351         | 0.2720         | <b>0.9089</b> | 0.2218         | 0.4617         | <b>0.1246</b> | 0.1782         | 0.2215         | <b>0.0919</b> |

Table 4: Multi-Modality Analysis: We compare our model with baselines on doors. The cosine metric means the cosine similarity between the predicted flow and the ground truth flow, the higher the better. RMSE metric means the root mean square error between prediction and ground truth, the lower the better. MAG metric means the flow magnitude error, the lower the better.

Fig 5 visualizes the denoising process that produces different modes based on the same fully closed door, demonstrating our model’s ability of preserving multi-modality for ambiguous examples.

## D Occlusion Analysis

We analyze our model’s performance under occlusions on different object categories. A door example is included in the Fig 2 of the main paper, and we include occluded fridge and furniture examples in Fig 6. We can see from the visualizations that with history, FlowBotHD is able to produce stable and robust predictions regardless of the occlusions while FlowBot3D makes less consistent predictions when severely occluded.

## E Real-world Equipment

In our real-world experiments, the point cloud data of the door comes from an Azure Kinect Depth Camera. The door is custom built out of plywood, with four pairs of hinges. This allows for it to be configured to open in all four of the possibilities of a standard door (forwards to the right, forwards to the left, backwards to the right, and backwards to the left). The door’s current configuration is determined by two thin allen key shaped metal rods, which connect a pair of hinges. Those hinges

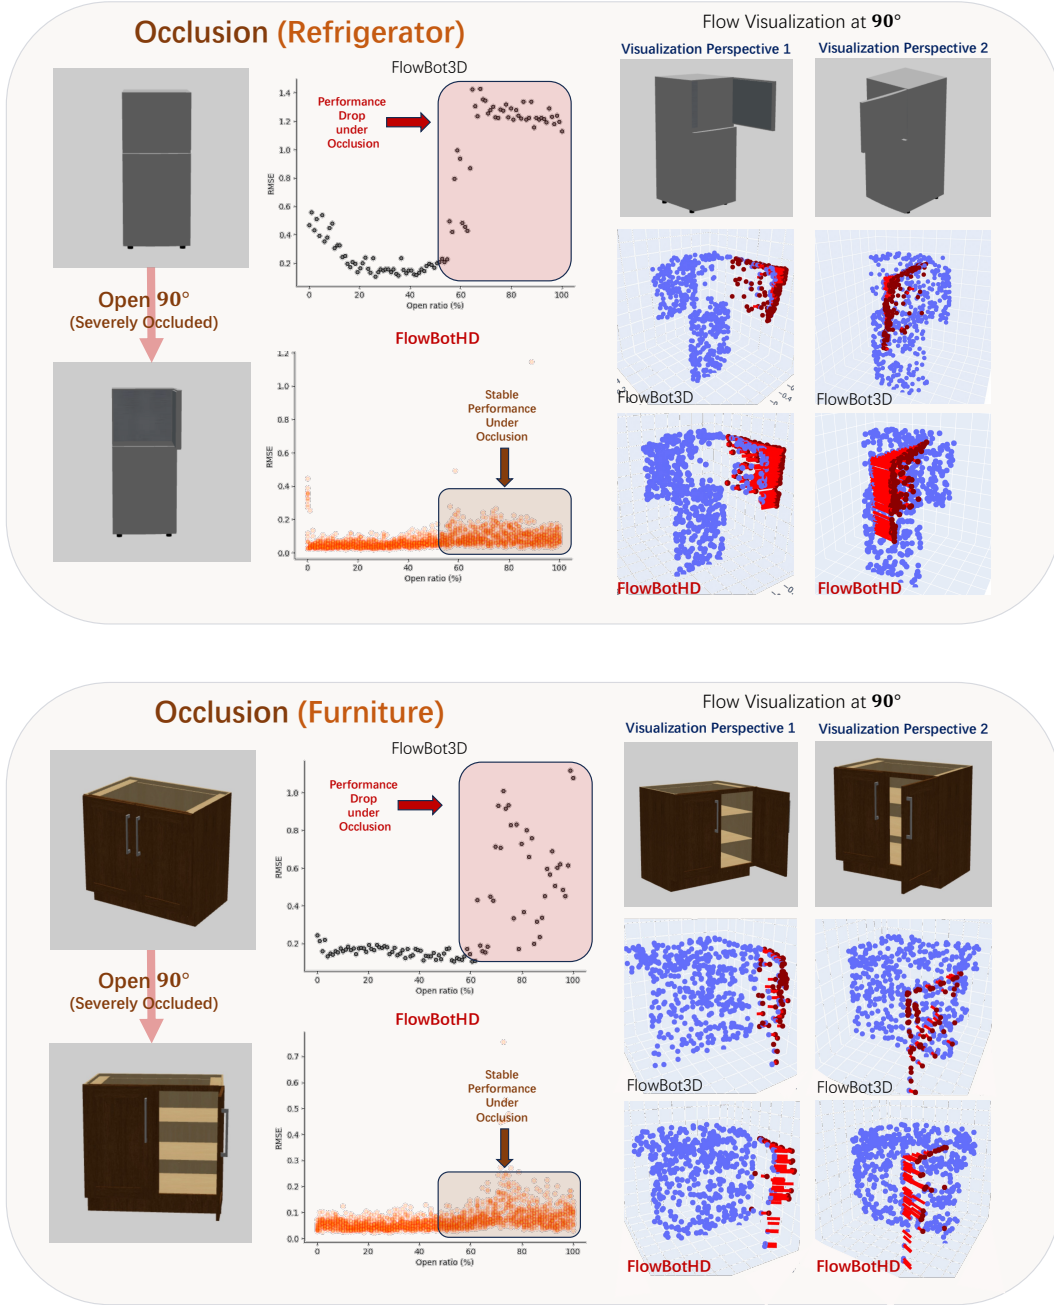

Figure 6: Occlusion analysis: We open the object to different angles, make predictions and plot the Cosine Similarity metric ( $\uparrow$ ) and RMSE metric ( $\downarrow$ ) against the open ratio. We also include flow visualizations from different viewing perspective to intuitively show the quality comparison of the predictions. We can see from the visualization that FlowBotHD can make good and consistent predictions even under severe occlusions.

448 are then effectively in use and determine how the door opens. The door's frame is 25 cm by 8.5 cm  
449 by 43.8 cm, with a 31.75 cm by 36 cm by 1.25 cm stabilizing base. The door itself is 16.83 cm by  
450 1.75 cm by 43.5 cm, with nothing on its front or back face to differentiate which way it opens. To  
451 ensure it fit in our workspace, we built it to be much smaller than a normal door, then scaled the  
452 point cloud up by two before passing it into the model.

## 453 **F Workspace**

454 We constructed our workspace in a 1.3 m by 1.3 m by 1.1 m space with Vention beams. The Azure  
455 Kinect Camera was placed so that it pointed toward the center of the workspace at an angle that  
456 allowed the door to be seen clearly.

## 457 **G Foreground Segmentation**

458 To isolate the door in the point cloud, we had to programmatically segment the table and background  
459 points. This was simply done by thresholding the  $x$ ,  $y$ , and  $z$  values of the points to effectively crop  
460 all points outside of the box where the object would be. For example, all points with  $z$  value below  
461 0.02 were removed, as that marks the top of the table.
